# Supplementary material for: Deriving Sex-Specific Anthropometric Cut-Points for Obesity and Cardiovascular Disease Risk in Qatari Adults
Source: Research Square preprint supplement (doi:10.21203/rs.3.rs-6264813/v1), 2025-04-21
Supplement: Supplementary file 1 [file 38a3b8095b8560c4fa91aaaa.xlsx]

## Sheet: Sheet1
Table 1. Characteristics of males and females from a Qatar BioBank cohort study sample (n = 5908)
Variable	Male (n = 2797)	Female (n = 3111)
	n (%)
	Mean (SD)
Age	40.1 (±12.9)	39.5 (±13.0)
Education	2461 (88)2	2574 (82)2
High School Completion
Income	1957 (70)2	1827 (58)2
< 20,000 QAR
Smoking Status	1381 (49)2	173 (6)2
Current smoker
Medication
HBP	281 (10)	317 (10)
T2DM	363 (13)	401 (13)
Statin	356 (12)	379 (12)
Physically Active	1878 (68)2	1829 (58)2
Anthropometrics
Height (cm)	171.8 (±6.66)1	157.9 (±5.98)1
Weight (kg)	84.4 (±16.7)1	73.8 (±15.8)1
Body Mass Index (kg/m²)	28.6 (±5.18)1	29.6 (±6.27)1
Waist Circumference (cm)	93.2 (±13.1)1	84.1 (±13.4)1
Hip Circumference (cm)	104.4 (±10.0)1	108.1 (±11.7)1
Waist to Hip Ratio	0.89 (±0.08)1	0.78 (±0.09)1
Waist to Height Ratio	0.54 (±0.08)1	0.53 (±0.09)1
Body Fat (%)	33.1 (±7.42)1	44.1 (±6.37)1
Prevalence of Obesity
BMI > 30 kg/m²	956 (34)	1404 (44)
%BF	2436 (87)	2829 (91)
Body Composition
Visceral Adipose Tissue (%)	4.28 (±2.01)1	2.05 (±1.21)1
Android Fat Mass (%)	40.8 (±11.3)1	7.38 (±1.55)1
Gynoid Fat Mass (%)	16.1 (±1.99)1	17.9 (±2.38)1
Trunk Fat Mass (%)	55.1 (±6.26)1	47.1 (±5.87)1
Leg Fat Mass (%)	31.5 (±5.27)1	38.5 (±5.73)1
Arm Fat Mass (%)	9.49 (±1.36)1	11.4 (±1.67)1
Clinical
Elevated Blood Pressure	641 (23)2	588 (19)2
Diabetes	537 (19)2	523 (17)2
Dyslipidemia	1774 (63)2	1752 (56)2
1Values that differ between Males and Females by t-test at p < 0.05
2Values that differ between Males and Females by Chi2 at p < 0.05
