# Supplementary material for: Deriving Sex-Specific Anthropometric Cut-Points for Obesity and Cardiovascular Disease Risk in Qatari Adults
Source: Research Square preprint supplement (doi:10.21203/rs.3.rs-6264813/v1), 2025-04-21
Supplement: Supplementary file 2 [file 41448a8bd2f1edd5292b4a82.docx]

**Figure S4.** Receiver operating characteristic (ROC) curves for obesity-related metrics in identifying dyslipidemia among males (A) and females (B). The evaluated metrics include body mass index (BMI), waist circumference (WC), waist-to-hip ratio (WHR), waist-to-height ratio (WHtR), and total body fat percentage (%BF). The optimal cut-points and corresponding Area Under the Curve at the cut-point (AUC) values for males were: BMI 27.6 kg/m² (AUC: 0.59), WC 90.5 cm (AUC: 0.63), WHR 0.87 (AUC: 0.65), WHtR 0.53 (AUC: 0.64), and %BF 31.7% (AUC: 0.61). For females, the optimal cut-points were: BMI 29.1 kg/m² (AUC: 0.62), WC 81.3 cm (AUC: 0.66), WHR 0.77 (AUC: 0.65), WHtR 0.52 (AUC: 0.66), and %BF 43.3% (AUC: 0.59). The diagonal reference line (AUC = 0.50) indicates the performance of a test equivalent to chance in identifying dyslipidemia.

**A**

**B**
