# Supplementary material for: Deriving Sex-Specific Anthropometric Cut-Points for Obesity and Cardiovascular Disease Risk in Qatari Adults
Source: Research Square preprint supplement (doi:10.21203/rs.3.rs-6264813/v1), 2025-04-21
Supplement: Supplementary file 3 [file 704cad38355c5507a9481b19.docx]

| **Table 3.** Multinominal logistic regression results for body mass index (BMI) misclassification in males and females**.** The reference group consists of individuals correctly classified without obesity by both BMI and total body fat percentage (%BF) based on the World Health Organization (WHO) BMI classification system and %BF thresholds for obesity. The table highlights the discordance between BMI and %BF classification, showing how various factors (age, physical activity, height, disease status, and body composition measures) are associated with misclassification into the other BMI/%BF discordant categories. There were no females who were classified with obesity by BMI and without obesity by %BF in our sample. | | | | | | | | | | | | | | | | |
| --- | --- | --- | --- | --- | --- | --- | --- | --- | --- | --- | --- | --- | --- | --- | --- | --- |
| Variables | Correctly classified with obesity by BMI & %BF | | | | | Without obesity by BMI, with obesity by %BF | | | | | With obesity by BMI, without obesity by %BF | | | | | |
| Males (n =2794) | | | | Females (n = 3107) | Males (n =2794) | | Females (n = 3107) | | | Males (n =2794) | | | | Females (n = 3107) | |
| RRR (95% CI) | | | | | | | | | | | | | | | |
| Descriptive (n = 3078) | | | | | | | | | | | | | | | | |
| Age | | 1.11 (1.10 - 1.13)*** | | | 1.11 (1.10 - 1.14)*** | | 1.10 (1.08 - 1.11)*** | | | 1.07 (1.05 - 1.09)*** | | | 0.98 (0.90 - 1.07) | | | -- |
| Physical Activity (Y/N) | | 0.54 (0.40 - 0.73)*** | | | 0.66 (0.49 - 0.89)** | | 0.64 (0.48 - 0.86)** | | | 0.83 (0.62 - 1.11) | | | 0.95 (0.18 - 4.89) | | | -- |
| Height (cm) | | 0.99 (0.97 - 1.01) | | | 0.98 (0.96 - 1.00) | | 0.98 (0.96 - 1.00) | | | 1.00 (0.98 - 1.02) | | | 0.93 (0.86 - 1.02)* | | | -- |
| Disease Status (n = 3091) | | | | | | | | | | | | | | | | |
| Elevated Blood Pressure | | 5.90 (3.64 - 9.57)*** | | 4.72 (2.62 - 8.50)*** | | | 2.81 (1.74 - 4.54)*** | | 1.72 (0.95 - 3.13) | | | -- | | | | -- |
| Diabetes | | 1.98 (1.26 - 3.13)** | | 2.40 (1.35 - 4.28)** | | | 1.69 (1.08 - 2.63)* | | 1.44 (0.80 - 2.57) | | | -- | | | | -- |
| Dyslipidemia | | 4.70 (3.57 - 6.19)*** | | 4.92 (3.63 - 6.67)*** | | | 3.25 (2.53 - 4.18)*** | | 3.11 (2.31 - 4.21)*** | | | 3.95 (0.93 - 16.8) | | | | -- |
| Body Composition (%) | | | | | | | | | | | | | | | | |
| Visceral Adipose Tissue | | | 2.51 (2.27 - 2.77)*** | 7.80 (6.30 - 9.66)*** | | | 2.11 (1.92 - 2.33)*** | | 4.03 (3.28 - 4.95)*** | | | | | 1.49 (0.95 - 2.34)*** | | -- |
| Gynoid Fat | | | 0.65 (0.61 - 0.70)*** | 0.51 (0.47 - 0.55)*** | | | 0.75 (0.71 - 0.80)*** | | 0.69 (0.65 - 0.74)*** | | | | | 1.07 (0.75 - 1.53) | | -- |
| Android Fat | | | 6.42 (5.57 - 7.40)*** | 8.67 (7.28 - 2.44)*** | | | 3.46 (3.06 - 3.93)*** | | 4.27 (3.63 - 5.01)*** | | | | | 1.25 (0.79 - 1.96) | | -- |
| Trunk Fat | | | 1.39 (1.35 - 1.43)*** | 1.42 (1.37 - 1.47)*** | | | 1.28 (1.25 - 1.32)*** | | 1.30 (1.26 - 1.34)*** | | | | | 1.00 (0.88 - 1.13) | | -- |
| Leg Fat | | | 0.83 (0.81 - 0.85)*** | 0.79 (0.76 - 0.81)*** | | | 0.86 (0.84 - 0.88)*** | | 0.84 (0.82 - 0.87)*** | | | | | 1.07 (0.93 - 1.23) | | -- |
| Arm Fat | | | 0.50 (0.45 - 0.55)*** | 1.03 (0.96 - 1.11) | | | 0.60 (0.55 - 0.66)*** | | 0.97 (0.90 - 1.05) | | | | | 0.63 (0.37 - 1.08) | | -- |
| * *p* < 0.05, ** p < 0.01, *** p < 0.001 | | | | | | | | | | | | | | | | |
