# Supplementary material for: Deriving Sex-Specific Anthropometric Cut-Points for Obesity and Cardiovascular Disease Risk in Qatari Adults
Source: Research Square preprint supplement (doi:10.21203/rs.3.rs-6264813/v1), 2025-04-21
Supplement: Supplementary file 4 [file 7d4140f4edc1e0672353a87b.docx]

| **Table 2.** Optimal body mass index (BMI), waist circumference (WC), waist-to-hip ratio (WHR), and waist-to-height ratio (WHtR) cut-points for defining obesity based on total body fat percentage (%BF) with associated sensitivity (%), specificity (%), and the area under the curve (AUC) at the cut-point for males and females. Additionally, optimal cut-points for BMI, WC, WHR, WHtR for elevated blood pressure (EBP), diabetes, and dyslipidemia disease status are displayed with the associated sensitivity, specificity, and AUC value. | | | | | | | | |
| --- | --- | --- | --- | --- | --- | --- | --- | --- |
| **Variable** | **Males (n = 2797)** | | | | **Females (n = 3111)** | | | |
| **Cut-point** | **Sensitivity** | **Specificity** | **AUC** | **Cut-point** | **Sensitivity** | **Specificity** | **AUC** |
| **Obesity** | | | | | | | | |
| BMI (kg/m2) | 25.2 | 0.83 | 0.81 | 0.82 | 24.8 | 0.85 | 0.91 | 0.88 |
| WC (cm) | 84.3 | 0.83 | 0.85 | 0.84 | 74.5 | 0.81 | 0.90 | 0.86 |
| WHR | 0.85 | 0.76 | 0.80 | 0.78 | 0.74 | 0.65 | 0.77 | 0.71 |
| WHtR | 0.50 | 0.81 | 0.89 | 0.85 | 0.46 | 0.82 | 0.91 | 0.86 |
| **Elevated Blood Pressure** | | | | | | | | |
| BMI (kg/m2) | 28.4 | 0.67 | 0.59 | 0.63 | 30.2 | 0.70 | 0.63 | 0.67 |
| WC (cm) | 94.8 | 0.70 | 0.65 | 0.67 | 86.5 | 0.74 | 0.67 | 0.71 |
| WHR | 0.91 | 0.73 | 0.64 | 0.69 | 0.79 | 0.73 | 0.66 | 0.69 |
| WHtR | 0.54 | 0.78 | 0.60 | 0.69 | 0.55 | 0.74 | 0.70 | 0.72 |
| %BF | 34.9 | 0.61 | 0.63 | 0.62 | 45.3 | 0.62 | 0.57 | 0.60 |
| **Diabetes** | | | | | | | | |
| BMI (kg/m2) | 27.8 | 0.66 | 0.51 | 0.59 | 30.2 | 0.64 | 0.61 | 0.63 |
| WC (cm) | 95.5 | 0.62 | 0.64 | 0.63 | 85.5 | 0.79 | 0.63 | 0.71 |
| WHR | 0.92 | 0.67 | 0.72 | 0.69 | 0.81 | 0.68 | 0.77 | 0.73 |
| WHtR | 0.56 | 0.65 | 0.64 | 0.65 | 0.56 | 0.69 | 0.73 | 0.71 |
| %BF | 34.8 | 0.56 | 0.60 | 0.58 | 44.6 | 0.60 | 0.51 | 0.55 |
| **Dyslipidemia** | | | | | | | | |
| BMI (kg/m2) | 27.6 | 0.60 | 0.58 | 0.59 | 29.1 | 0.61 | 0.62 | 0.62 |
| WC (cm) | 90.5 | 0.66 | 0.60 | 0.63 | 81.3 | 0.70 | 0.62 | 0.66 |
| WHR | 0.87 | 0.71 | 0.60 | 0.65 | 0.77 | 0.62 | 0.67 | 0.65 |
| WHtR | 0.53 | 0.66 | 0.62 | 0.64 | 0.52 | 0.70 | 0.63 | 0.66 |
| %BF | 31.7 | 0.70 | 0.53 | 0.61 | 43.3 | 0.67 | 0.51 | 0.59 |
