# Supplementary material for: Deriving Sex-Specific Anthropometric Cut-Points for Obesity and Cardiovascular Disease Risk in Qatari Adults
Source: Research Square preprint supplement (doi:10.21203/rs.3.rs-6264813/v1), 2025-04-21
Supplement: Supplementary file 5 [file 7db37b6110d7f049fe0f8648.docx]

| **Table S1.** Comparison of prevalence of obesity (%) using cut-points recommended by the by World Health Organization (WHO) and cut-points from analysis of receiver-operating characteristic (ROC) curves from a Qatar BioBank cohort study sample for body mass index (BMI, kg/m2), waist circumference (cm), waist-to-hip ratio (WHR), and waist-to-height ratio (WHtR). | | | | |
| --- | --- | --- | --- | --- |
| **Sex** | **Metric** | **WHO n (%)** | **ROC n (%)** | **Misclassification (%)** |
| Males | BMI (n = 5998) | 956 (34)1 | 2107 (74)1 | 54.6 |
| WC (n = 5994) | 1784 (63)1 | 2102 (74)1 | 15.1 |
| WHR (n = 5994) | 1271 (45)1 | 1964 (69)1 | 24.5 |
| WHtR (n = 5994) | 2011 (71) | 2011 (71) | 0.00 |
| Females | BMI (n = 5998) | 1404 (33)2 | 2462 (78)2 | 43.0 |
| WC (n = 5994) | 295 (9)2 | 2354 (74)2 | 87.5 |
| WHR (n = 5994) | 580 (18)2 | 2027 (64)2 | 45.7 |
| WHtR (n = 5994) | 1988 (63)2 | 2491 (79)2 | 15.9 |
| 1Significant difference found between WHO & ROC methods for Males using McNemar's test at p < 0.05 | | | | |
| 2Significant difference found between WHO & ROC methods for Females using McNemar's test at p < 0.05 | | | | |
