# Supplementary material for: Deriving Sex-Specific Anthropometric Cut-Points for Obesity and Cardiovascular Disease Risk in Qatari Adults
Source: Research Square preprint supplement (doi:10.21203/rs.3.rs-6264813/v1), 2025-04-21
Supplement: Supplementary file 6 [file ad347f59331c301add12050b.docx]

| **Table S2.** Misclassification of obesity by the World Health Organization's body mass index (BMI, kg/m2) categories based on body fat percentage (%BF), stratified by sex in a Qatar BioBank sample (n = 5908). | | | | | | |
| --- | --- | --- | --- | --- | --- | --- |
| **Sex** | **BMI Category** | **n (%) of Total** | **%BF Obesity Criterion** | **Misclassified as without obesity by %BF (n, %)** | **Misclassified as with obesity by %BF (n, %)** | **Total Misclassified (n, %)** |
| **Males** (n = 2797) | Normal Weight | 630 (22.5) | %BF ≥ 25% | 0 (0.00) | 384 (61.0) | 384 (61.0) |
| Overweight | 1178 (42.1) | %BF ≥ 25% | 0 (0.00) | 1109 (94.1) | 1109 (94.1) |
| Obesity | 948 (33.9) | %BF ≥ 25% | 8 (0.84) | 0 (0.00) | 8 (0.84) |
| **Females** (n = 3111) | Normal Weight | 649 (20.9) | %BF ≥ 35% | 0 (0.00) | 465 (71.6) | 465 (71.6) |
| Overweight | 1009 (32.4) | %BF ≥ 35% | 0 (0.00) | 985 (97.6) | 985 (97.6) |
| Obesity | 1375 (44.2) | %BF ≥ 35% | 0 (0.00) | 0 (0.00) | 0 (0.00) |
