# Supplementary material for: Deriving Sex-Specific Anthropometric Cut-Points for Obesity and Cardiovascular Disease Risk in Qatari Adults
Source: Research Square preprint supplement (doi:10.21203/rs.3.rs-6264813/v1), 2025-04-21
Supplement: Supplementary file 7 [file c2dcc1aca823e927e920c501.docx]

**Figure S2.** Receiver operating characteristic (ROC) curves for obesity-related metrics in identifying elevated blood pressure (EBP) among males (A) and females (B). The evaluated metrics include body mass index (BMI), waist circumference (WC), waist-to-hip ratio (WHR), waist-to-height ratio (WHtR), and total body fat percentage (%BF). The optimal cut-points and corresponding Area Under the Curve at the cut-point (AUC) values for males were: BMI 28.4 kg/m² (AUC: 0.63), WC 94.8 cm (AUC: 0.67), WHR 0.90 (AUC: 0.69), WHtR 0.54 (AUC: 0.69), and %BF 34.9% (AUC: 0.62). For females, the optimal cut-points were: BMI 30.2 kg/m² (AUC: 0.67), WC 86.5 cm (AUC: 0.71), WHR 0.79 (AUC: 0.69), WHtR 0.55 (AUC: 0.72), and %BF 45.4% (AUC: 0.60). The diagonal reference line (AUC = 0.50) indicates the performance of a test equivalent to chance in identifying EBP.

**A**

**B**
