# Supplementary material for: Deriving Sex-Specific Anthropometric Cut-Points for Obesity and Cardiovascular Disease Risk in Qatari Adults
Source: Research Square preprint supplement (doi:10.21203/rs.3.rs-6264813/v1), 2025-04-21
Supplement: Supplementary file 9 [file d25270585a88a3d53a39eedf.docx]

**B**

**A**

**Figure S1.** Receiver Operating Characteristic (ROC) curves for Body Mass Index (BMI), Waist Circumference (WC), Waist-to-Hip Ratio (WHR), and Waist-to-Height Ratio (WHtR) based on body fat percentage (%BF). (A) ROC curves for males: The Area Under the Curve (AUC) was 0.82 for BMI with a cut-point of 25.2 kg/m², 0.84 for WC with a cut-point of 84.3 cm, 0.78 for WHR with a cut-point of 0.85, and 0.85 for WHtR with a cut-point of 0.50. (B) ROC curves for females: The AUC was 0.88 for BMI with a cut-point of 24.8 kg/m², 0.86 for WC with a cut-point of 74.5 cm, 0.71 for WHR with a cut-point of 0.74, and 0.86 for WHtR with a cut-point of 0.46. The solid diagonal reference line (AUC = 0.50) indicates performance no better than chance in identifying individuals with obesity.
